# Supplementary material
Source: Springer Nature journal article supplement (https://www.springermedizin.de/resource/supplementary/13058_2004_961_MOESM3_ESM.pdf/9705738)

**(a)**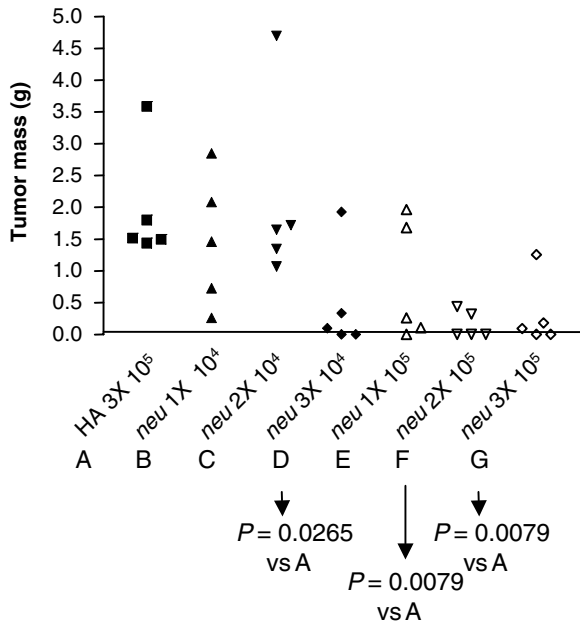**(b)**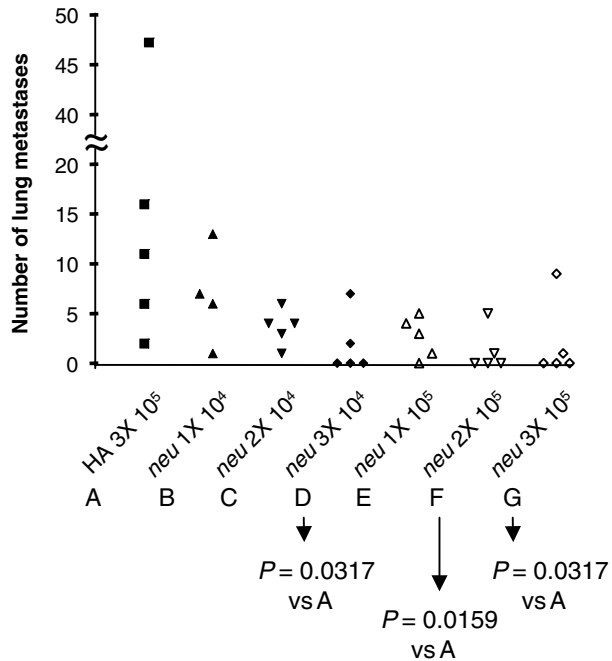

Supplement: MOESM3 [file 9705738]
